# Supplementary material for: Resolving the dynamic properties of entangled linear polymers in non-equilibrium coarse grain simulation with a priori scaling factors
Source: Royal Society of Chemistry journal article supplement (doi:10.1039/d3nr06185j), 2024-01-01
Supplement: d3nr06185j1.pdf [file d3nr06185j1.pdf]

Supporting Information

**Resolving the Dynamic Properties of Entangled Linear Polymer  
in Non-equilibrium Coarse Grain Simulation with *a priori* Scaling  
Factor**

*Yihan Nie*<sup>1,2</sup>, *Zhuoqun Zheng*<sup>3</sup>, *Chengkai Li*<sup>1</sup>, *Haifei Zhan*<sup>2,1,4\*</sup>, *Liangzhi Kou*<sup>1,4</sup>, *Yuantong  
Gu*<sup>1,4\*</sup> and *Chaofeng Lü*<sup>5,2</sup>

<sup>1</sup>School of Mechanical, Medical and Process Engineering, Queensland University of  
Technology (QUT), Brisbane QLD 4001, Australia

<sup>2</sup>College of Civil Engineering and Architecture, Zhejiang University, Hangzhou 310058,  
China

<sup>3</sup>Center for Materials Science, Queensland University of Technology (QUT), Brisbane,  
Queensland 4001, Australia

<sup>4</sup>School of Astronautics, Nanjing University of Aeronautics and Astronautics, Nanjing  
210016, China

<sup>5</sup>Faculty of Mechanical Engineering & Mechanics, Ningbo University, Ningbo 315211, P.R.  
China

## S1 Structural distribution functions for the IBI, LIBI, and HIBI in 2BD and 1BD model

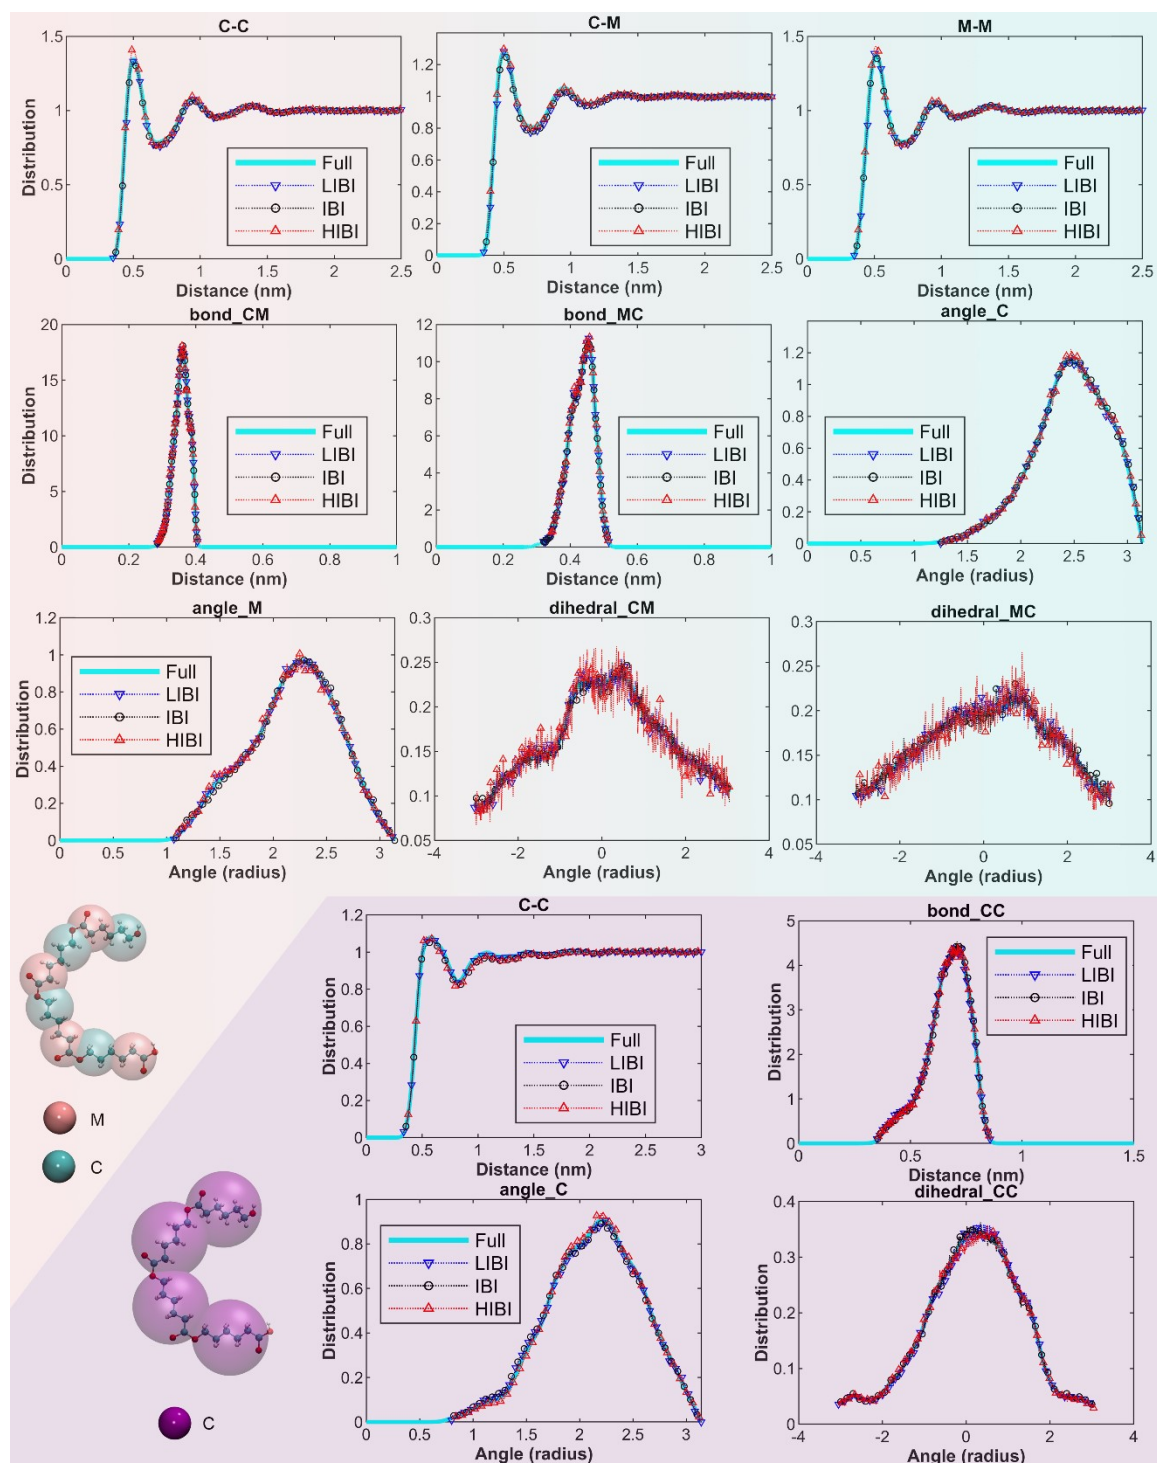

**Figure S1** The distribution functions predicted by the IBI, LIBI and HIBI can match well with the full-atomic results in 2BD and 1BD models.

## S2 Structural distribution functions for EIBI.

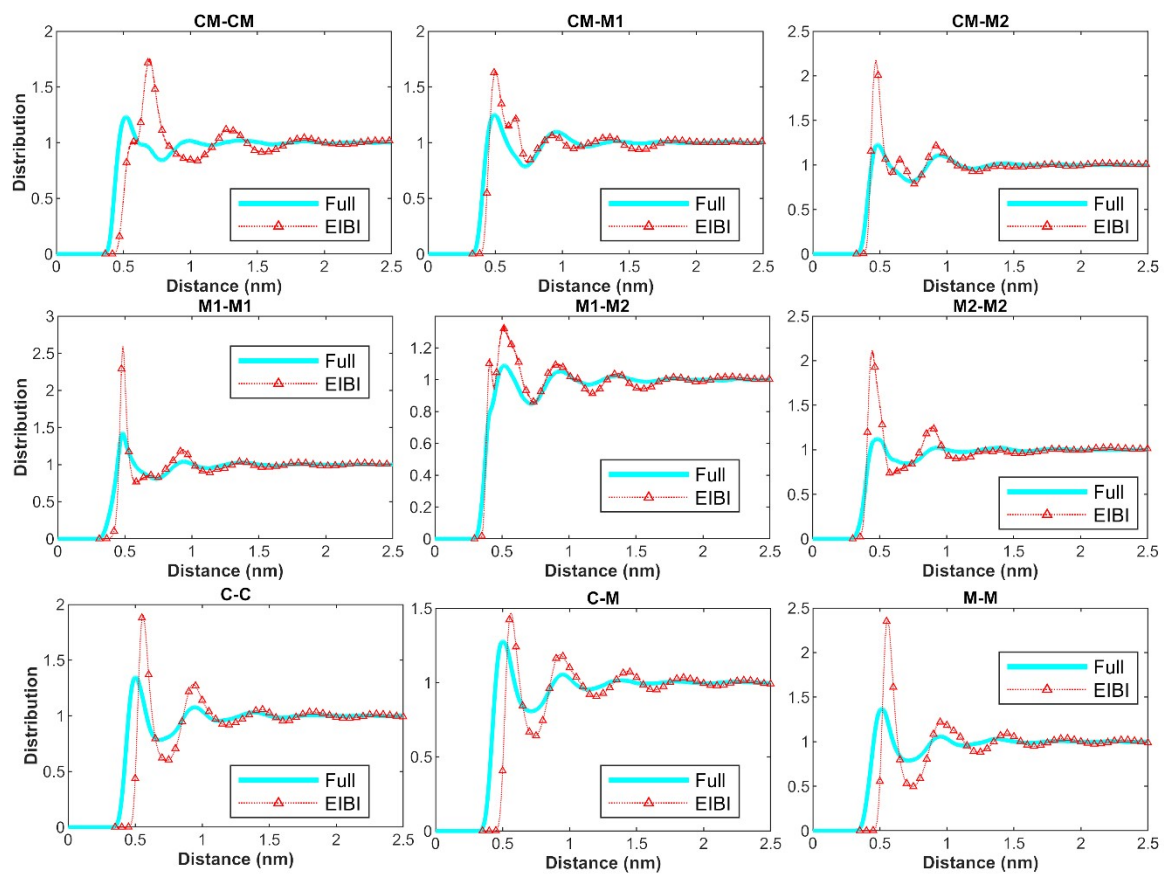

**Figure S2** The structural distribution functions in 2BD and 3BD models with EIBI potential.

### S3 Structural distribution functions for the DPD thermostat in 3BD model

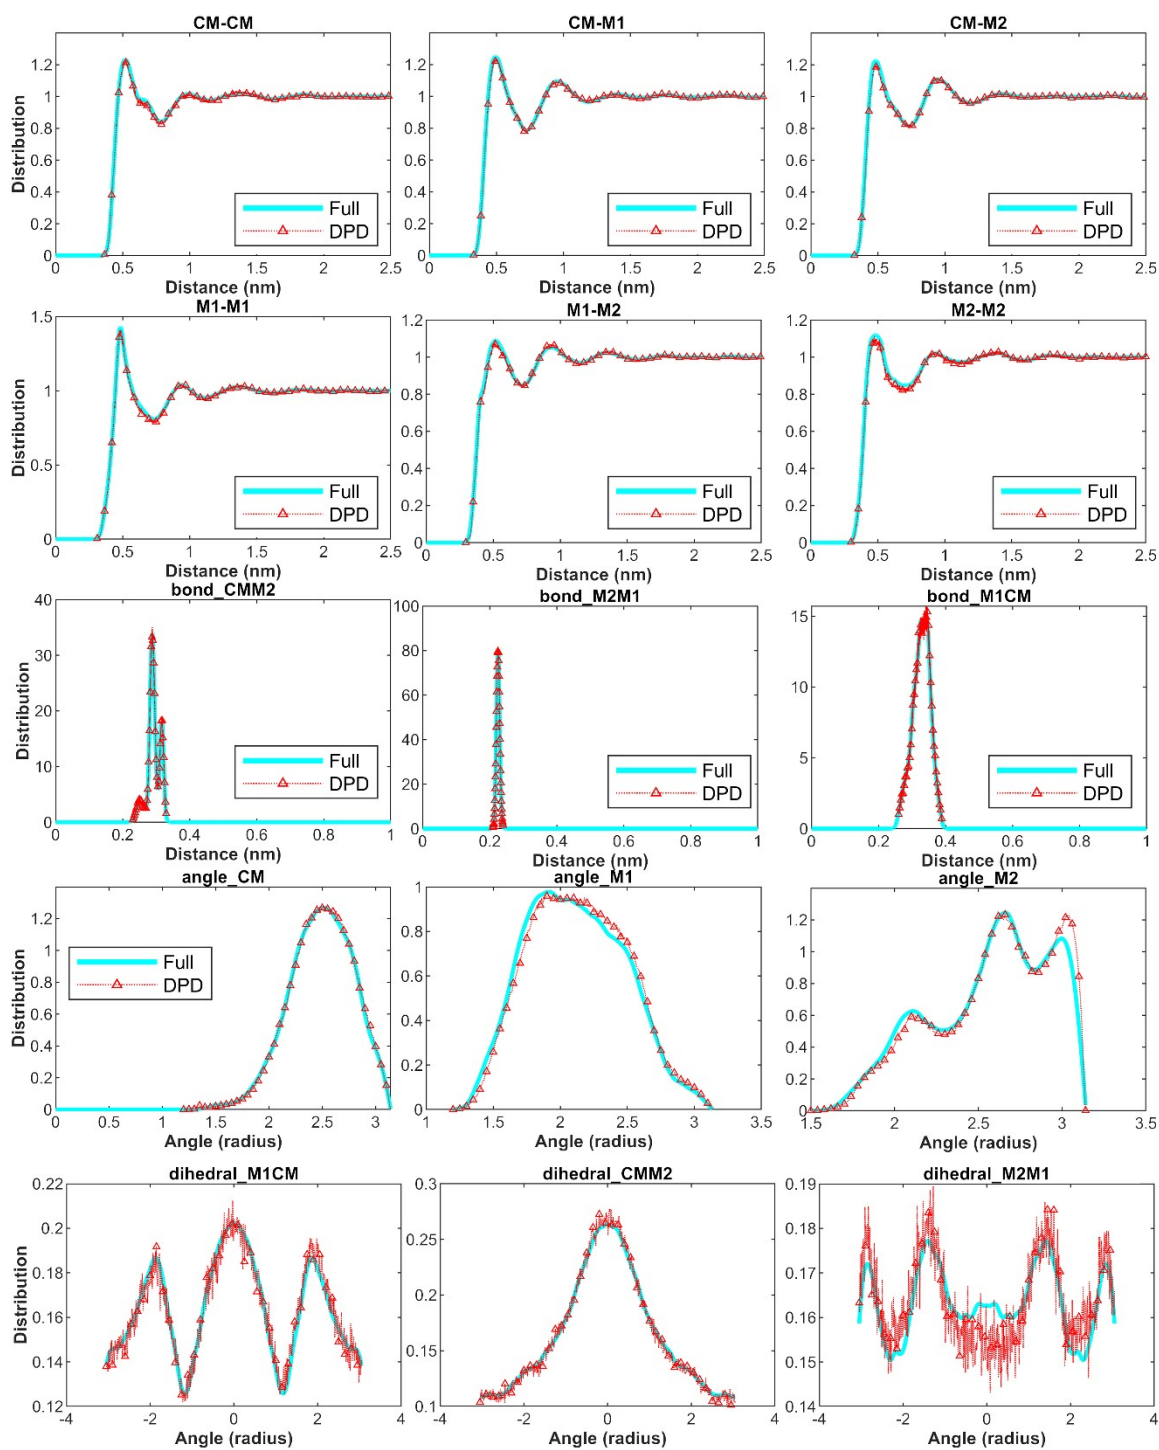

**Figure S3** The structural distribution functions in 3BD model with IBI potential and DPD thermostat.

### S4 Structural distribution functions for the DPD thermostat in 2BD and 1BD model

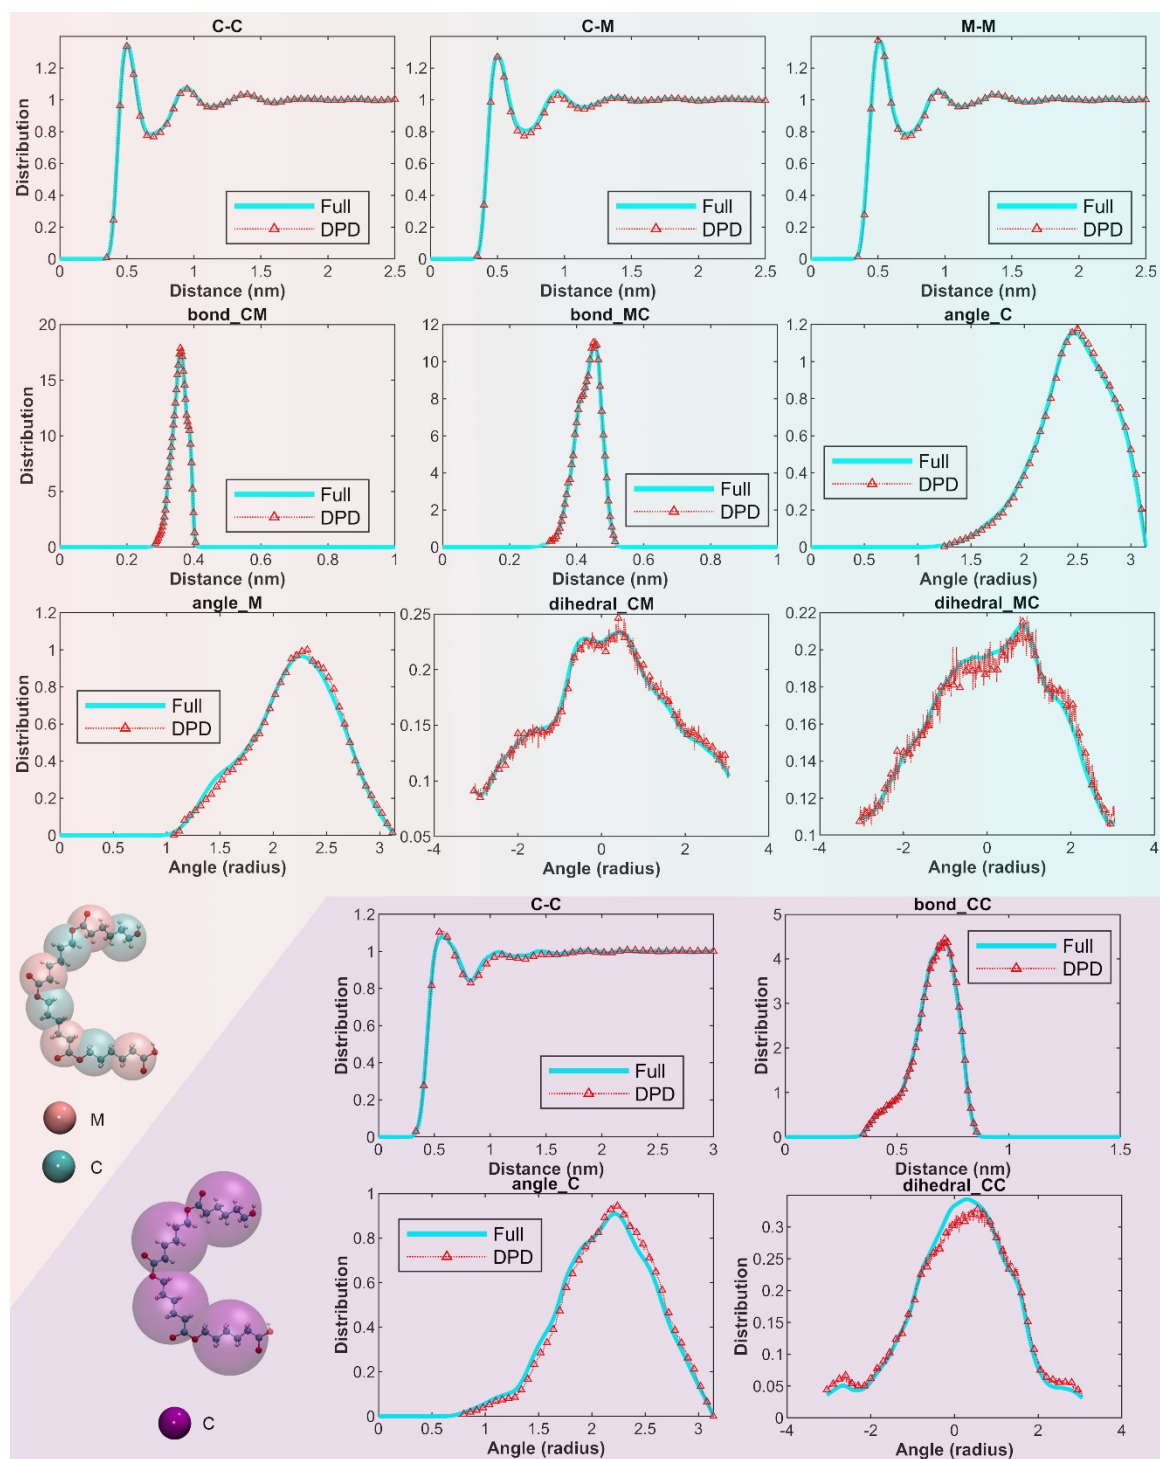

**Figure S4** The structural distribution functions in 2BD and 1BD model with IBI potential and DPD thermostat.

### S5 Mean squared displacement curves during the relaxation.

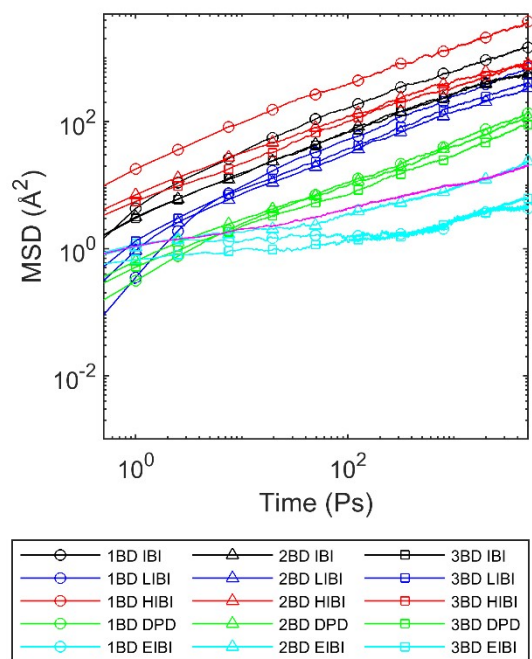

**Figure S5** The MSD curves of the atoms and CG beads for different models.



## S6 Enthalpy at different temperatures in different CG models

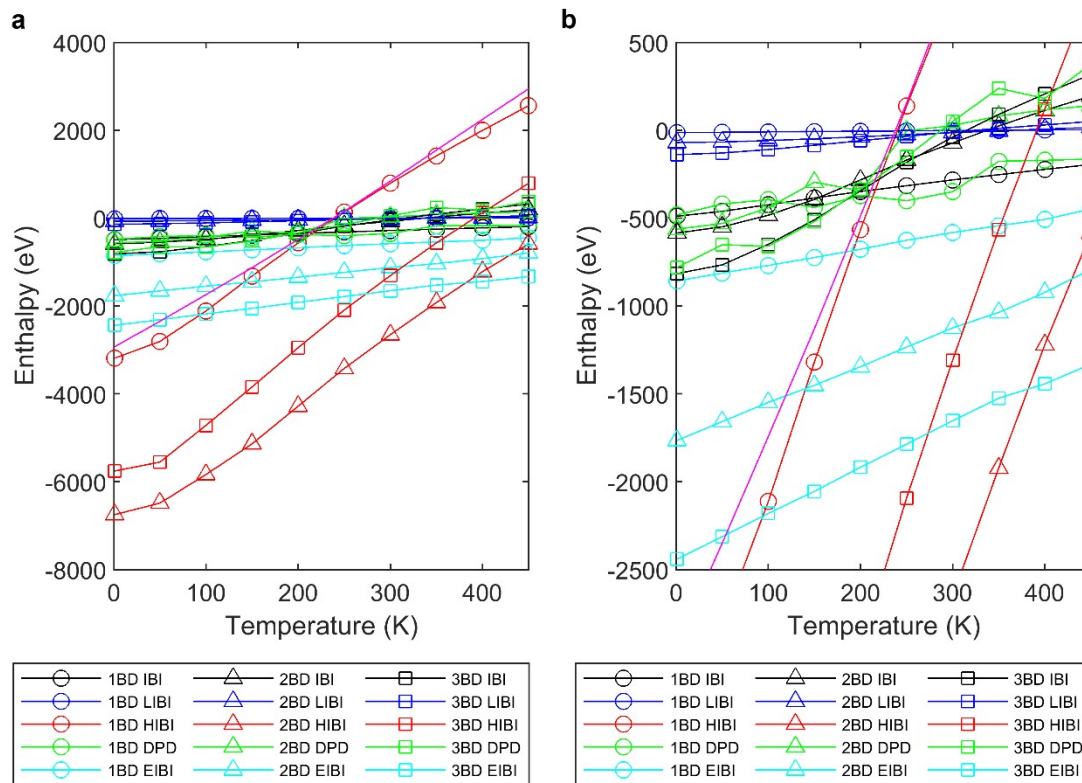

**Figure S6** For the DPD model, as the non-conservative force is added, the pressure has a larger fluctuation than the IBI with the Nose-Hoover thermostat, which results in a larger fluctuation in enthalpy, but the value is close to IBI results on average. As for the EIBI method, the enthalpy is lower than that of the IBI results.

### S7 Young's modulus at different strain rates in different CG models

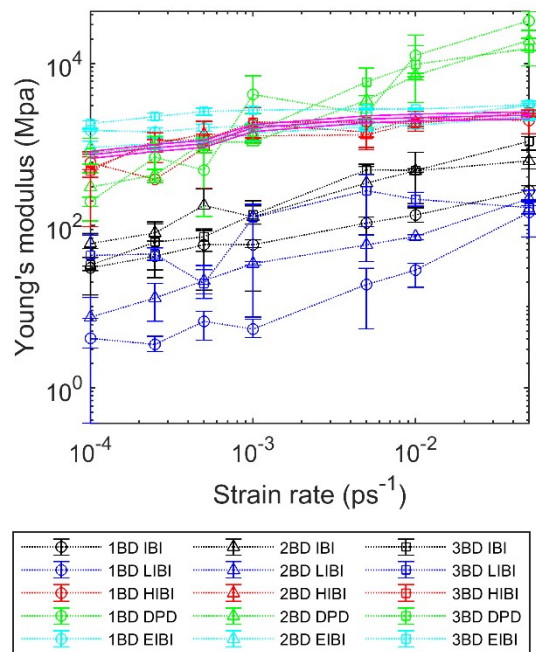

**Figure S7** The Young's modulus in different CG models with different strain rates. The error bar shows the variance from the tensile tests in the three orthogonal directions for each model.



**S8 The stress- strain curves for each model under different tensile rates.**

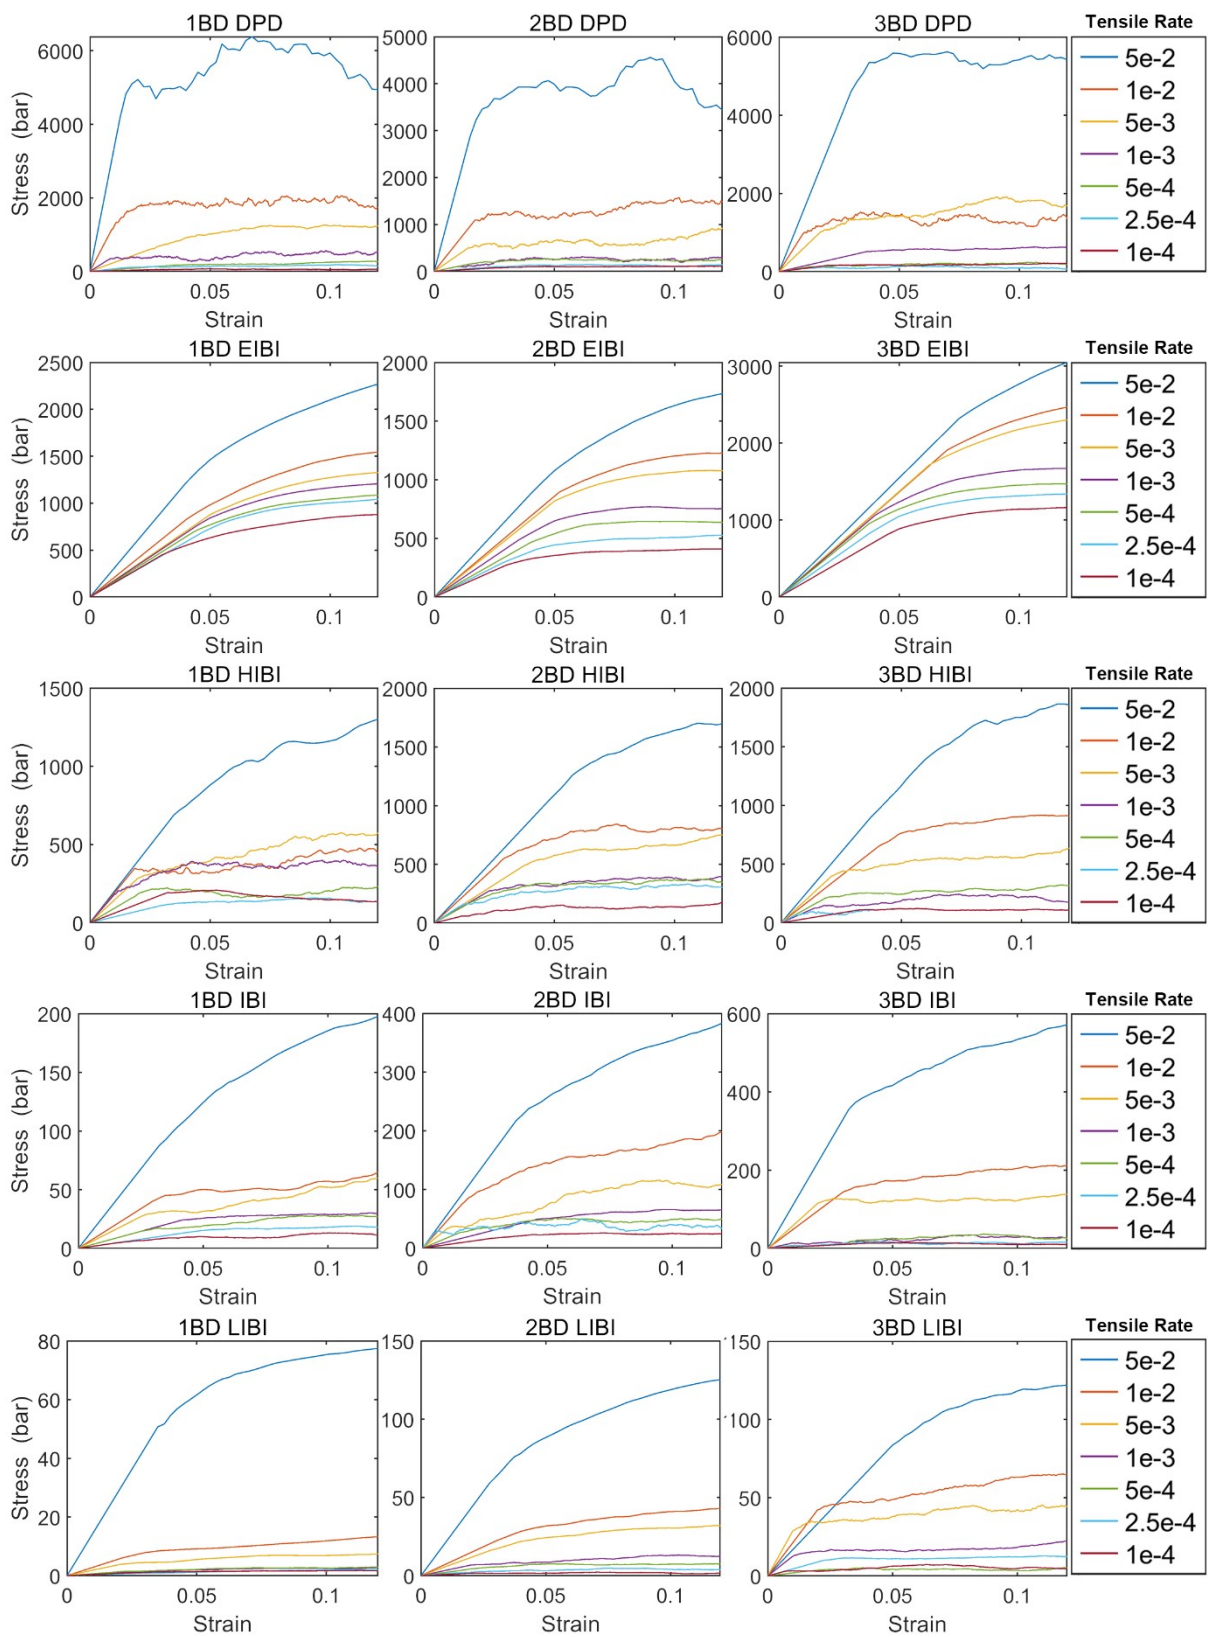

**Figure S8** The stress-strain curve for each model under different tensile rates. The stress-strain curve is the averaged result from the tensile test in three directions.
